# Supplementary material for: Identifying the role of vision transformer for skin cancer—A scoping review
Source: Front Artif Intell. 2023 Jul 17;6:1202990. doi: 10.3389/frai.2023.1202990 (PMC10388102; doi:10.3389/frai.2023.1202990)
Supplement: Supplementary Files — Characteristics and materials in the studies. [file Table_2.XLSX]

## Sheet: Data_synthesizing
S. No	References	Title	Year	Authors	Online repository	Type of paper	First author location	Dataset (s) used	Dataset status (Available publically or not)	Dataset Link (website, kaggle, GitHub, etc.)	Classification technique(s) proposed	Classification results	Performance metrics	Comparison with benchmark models	Lesion visualization process	Number of images used for the experimental and simulation work (Training and Test splits	Code access	Real-time evaluation	Hardware requirements	Hyper parameters selected
1	[26]	Scale-Aware Transformers for Diagnosing Melanocytic Lesions.	2021	Wu W and Mehta S and Nofallah S and Knezevich S and May CJ and Chang OH and Elmore JG and Shapiro LG	IEEE Xplore	Journal article	USA	M-Path	public	https://github.com/meredith-wenjunwu/ScATNet	MobileNetv2 (trained on the ImageNet dataset) and the CNN for extracting patch-wise embeddings.	This model generated an accuracy of 0.64, F1 score of 0.64, sensitivity of 0.64, and specificity of 0.88 much similar to real time analysis by humans.	Accuracy, sensetivity, specificity, F-score, ROI, ROC, and AUC values	Weighted feature aggregation, ChikonMIL, MS-DA-MIL, and Streaming-CNN.	In this research work individual tissue slices were extracted using a histogram-based segmentation method and other morphological operations (opening-closing and hole filling) and contour-related operations available in OpenCV.	A total of 240 images were used for the experimental and simulational work. These images are partitioned as follows: 102 images were used for trainings. 23 images were used for the validation purposes 115 images were used for the testing purposes	https://github.com/meredith-wenjunwu/ScATNet	This model achieved comparable performance to 187 practicing U.S. pathologists who interpreted the same cases in an independent study.	These models are trained on a single NVIDIA GeForce 2080 GPU with 10 GB GPU memory.	Epoch size: 200 epochs in an end-to-end fash- Optimizer: ADAM Learning rate: The learning rate is first warmed up from 10−6 to 5 × 10−4 in 500 steps. In the next 50 epochs, the model is trained with a learning rate of 5 × 10−4. After that, the learning rate is reduced by half at the 100-th and 150-th epochs.
2	[27]	Improving the Diagnosis of Skin Biopsies Using Tissue Segmentation.	2022	Nofallah S and Li B and Mokhtari M and Wu W and Knezevich S and May CJ and Chang OH and Elmore JG and Shapiro LG	PubMed	Journal article	USA	M-Path	public	Can be provided on request: http://group.bmj.com/group/rights-licensing/permissions	Transformer model based on wavelet scattering network (ScatNet) in association with Tissue segmentation mechanism to perform the diagnosing of skin biopsies.	F-score of 0.60, sensitivity of 0.60, and specificity of 0.87	F-score, sensitivity, and specificity	Compared with US pathologist results Dermal Nest classification architecture Multiple Instance Learning with Center Embeddings (ChikonMIL), Dual-stream Multiple Instance Learning Network (DSMIL), Weighted Feature Aggregation	MobileNetv2 pre-trained on the ImageNet dataset is used for feature extractoion.	Random number of images are used for training and testing process.	Can be provided on request: http://group.bmj.com/group/rights-licensing/permissions	They accessed to the interpretation of 187 US pathologists on the same testing set used for the validation and experimentaion of their model. A high F-score, sensitivity and low specificity is reported for their results.	Not specified	ScATNet was trained for 200 epochs in an end to end fashion using the ADAM optimizer with a linear learning rate warm-up strategy and step learning rate decay. The best result in our experimental studies was achieved using a single scale of 7.5×.
3	[28]	FAT-Net: Feature adaptive transformers for automated skin lesion segmentation.	2022	Wu H and Chen S and Chen G and Wang W and Lei B and Wen Z	PubMed	Journal article	Netherlands	ISIC 2016, ISIC 2017, ISIC 2018, and PH2 datasets	public	https://www.kaggle.com/datasets/synked/ph2-modified https://challenge.isic-archive.com/data	Pipelined design consist of adaptive transformer network based on the classical encoder-decoder architecture, named FAT-Net in association with a memory-efficient decoder and a feature adaptation module to enhance the feature fusion between the adjacent-level features by activating the effective channels and restraining the irrelevant background noise.	This model outperformed by generating 91.00%, 95.78%, 82.02% and 89.03% in terms of SE, ACC, IoU, and Dice, respectively. Moreover, it achieved an FPS score with a mean value of 51,	SEnsitivity (SE), SPecificity (SP), ACCuracy (ACC), Intersection over Union (IoU) and Dice coefficient (Dice).	UNet AttU-Net ResUNet+ FTL CPFNet ERU DAGAN CKDNet	They integrated the attention layer in the CNN-encoder and in the transformer-encoder model for visulaizing the lesion segementaion.	The total image numbers in the four datasets and their data partitions are as follows: • ISIC 2016. It contains a total of 1279 RGB skin lesion images, where 900 images are selected for training and 379 images are used for testing. • ISIC 2017. In the ISIC 2017 dataset 2000 images are used for training, 150 images for validation, and 600 images for testing purposes. • ISIC 2018. This dataset cont…	https://github.com/SZUcsh/FAT-Net	Nil	They implemented the FAT-Net model in PyTorch using a single NVIDIA RTX 2080Ti GPU card.	Learning rate: 0.001 Epoch size: 50 adopted a SGD with a Momentum: 0.9 Weight-decay: 0 Regulizer: SGD Batch size: 2
4	[29]	Enhanced deep bottleneck transformer model for skin lesion classification	2022	Nakai, K. and Chen, Y.-W. and Han, X.-H.	Scopus	Journal article	Japan	ISIC2017 and HAM10000	public	https://www.kaggle.com/datasets/kmader/skin-cancer-mnist-ham10000	Bottleneck transformed model by incorporating a dual position encoding module to integrate encoded position vector on both key and query vectors for balance learning. In this bottleneck model, the authors have used ResNet50 and DenseNet201 backbones for skin lesion classification.	On the ISIC2017 dataset, this model generated an accuracy of 92.1%, sensitivity of 90.1%, and specificity of 91.9%, respectively. While and overall accuracy and precision of 95.84% and 96.1% are recorded for the HAM10000 dataset.	accuracy, specificity, and sensitivity	Res50 RAN50 SEnet50 ARL-CNN50 InceptionResNet12+SA InceptionResNet5+SA	Anenhanced deep bottleneck transformer model, which incorporates self-attention to model the global correlation of the extracted features from the conventional deep models, for boosting the skin lesion performance.	They randomly split the images in both of the datasets into training and test subsets with 0.8∕0.2 ratio, and performed augmentation to achive similar number of images in both of the datasets for all the seven types of skin melanomas.	Can be provided on request: http://mlp.sci.yamaguchi-u.ac.jp/index_EN.html	Nil		AdamW is selected as an optimizer for both of the datasets with 200 epoch size, while the learning rates and other parameters are vaired for the two datasets. ISIC2017 - Lr: 1.0e^-05, weight decay: 5.62e^-10, Batch size: 16 HAM10000 - Lr: 1.0e^-04, weight decay: 8.0e^-5, Batch size: 16
5	[30]	An Effective Skin Cancer Classification Mechanism via Medical Vision Transformer	2022	Aladhadh, S. and Alsanea, M. and Aloraini, M. and Khan, T. and Habib, S. and Islam, M.	PubMed	Journal article	Saudi Arabia	Human Against Machine (HAM10000) datasets	public	https://www.kaggle.com/datasets/kmader/skin-cancer-mnist-ham10000	They developed a two-tier architecture 1. Data Augmentation, 2. Medical Vision Transformer	An overall perfomrance results of 96%, 96.55%, 97%, and 97.14% in precision, recall, F1 score, and accuracy respectively, were achieved.	Precision, recall/sensitivity, F-score, accuracy, training and validation loss	DenseNet Ensemble Learning mechanism MobileNet ResNet	Grad-CAM isualization mechanism to generate a heat map of the infected region	A total of 10,015 images were obtained, where 70% of the data is used for training purposes, 20% of the data for validation and 10% for testing purposes	Nil	Nil	For this research work, the authors have used Python 3.6, Tensor-Flow with Keras front ends on a Core i5-7200u Central Processing Unit (CPU) (2.7 GHz) with a main memory of 8 GB and a GeForce (2060 gtx) Graphic Processing Unit (GPU) of 6 GB.	For this simulation, the authors used a pre-trained model with 50 epoch size.
6	[31]	Fully transformer network for skin lesion analysis	2022	He, X. and Tan, E.-L. and Bi, H. and Zhang, X. and Zhao, S. and Lei, B.	PubMed	Journal article	USA	ISIC 2018 datase	public	https://www.kaggle.com/datasets/nodoubttome/skin-cancer9-classesisic	The authors proposed a propose a Fully Transformer Network (FTN) to learn long-range contextual information for skin lesion analysis. FTN is a hierarchical Transformer computing features using Spatial Pyramid Transformer (SPT). SPT has linear computational complexity as it introduces a spatial pyramid pooling (SPP) module into multi-head attention (MHA)to largely reduce the computation and memory…	After simulation, the authors concluded that their model (FTN) is 2.18, 5.36, 6.38, 12.5 and 5 times more efficient than UNet, FCN, ResUNet, R2UNet and AttUNet, respectively.	accuracy, specificity, sensitivity, AUC values, JI index, F score, dice coeffeicent,	FCN Unet ResUNet R2UNet AttUNet	They exploited the use of FTN for lesion boundaries detection and image segementaion purposes.	Not available	https://github.com/Novestars/Fully-Transformer-Network	Nil	This model is implemented on PyTorch frame with an NVIDIA RTX TITAN GPU. We employ an .	Optimizer: AdamW Weight decay: 0.0001 momentum: 0.9 training epoch: 100 Batch size: 20 learning rate: 0.0002, and a cosine decay learning rate scheduler are used
7	[10]	DPE-BoTNeT: Dual Position Encoding Bottleneck Transformer Network for Skin Lesion Classification	2022	Nakai, K. and Han, X.-H.	IEEE Xplore	Conference paper	Japan	HAM10000 and ISIC2017	public	https://www.kaggle.com/datasets/kmader/skin-cancer-mnist-ham10000 https://www.kaggle.com/datasets/awsaf49/isic-2017	A Dual Position Encoding Bottleneck Transformer Network is proposed using DenseNet architecture on the two different benchmark datasets.	an overall accuracy of 95.8%, precision of 96.1%, and F-score of 95.9% is achieved.	Accuracy, F-score, sensitivity, and specificity	RAN50, SENet50, and ARL-CNN50 that were implemented on the ResNet50 backbone using different attention modules.	They used the DPE-BoTNet for skin lesion classification and performed extensive experiments to validate its applicability.	The HAM10000 dataset consists of ×10015 dermatoscopic images with 450×600. For model input and training purposes all these images are resized and cropped to 320×320 image size. The ISIC2017 dataset includes a total of 2600 images of size 767 × 1022. The authors selected 2000 images for the training subset and 600 images for the test subset.	Can be provided on request: http://mlp.sci.yamaguchi-u.ac.jp/index_EN.html	N/A	N/A	AdamW is selected as an optimizer for the two different datasets, while the learning rates and other parameters are vaired for the two datasets. ISIC2017 - Lr: 1.0e^-05, weight decay: 5.62e^-10, Batch size: 16 HAM10000 - Lr: 1.0e^-04, weight decay: 8.0e^-5, Batch size: 16
8	[9]	ICL-Net: Global and Local Inter-pixel Correlations Learning Network for Skin Lesion Segmentation	2022	Cao, W. and Yuan, G. and Liu, Q. and Peng, C. and Xie, J. and Yang, X. and Ni, X. and Zheng, J.	IEEE Xplore	Journal article	China	ISIC 2018, ISIC2016, and PH2	public	https://www.kaggle.com/datasets/synked/ph2-modified	A Pyramid transformer inter-pixel correlations (PTIC) module is used to capture the non-local context information of different levels and further exploring the global pixel-level relationship to deal with the large variance of shape and size. Then, they also introduced a local neighborhood metric learning (LNML) module to strengthen the local semantic correlations learning capability and increase…	an overall accuracy, JCI, DSC, sensitivity, and specificity of 0.9710±0.0014, 0.8327±0.0049, 0.9003±0.0038, 0.9082±0.0084, and 0.9849±0.0014 is recorded respectively.	dise similarity coeffecients, accuracy, specificity, sensitivity, jacard similarity index (JSI), TF values.	FCN U-Net CENet CTLNet CANet CPFNet DFNet FATNet BAT	PTIC is used for skin lesion detection and boundaries evalution.	For training and testing purposes, they followed K-fold mechanims. As the ISIC2018 dataset has 2594 training dermoscopic images, they used four-fold cross-validation on this dataset. (2) 900 images of the ISIC2016 dataset are used for training, and 200 images of the PH2 dataset are used for testing.	Nil	Nil	They implemented this model on publicaly available Pytorch framework with an NVIDIA GeForce RTX 3090 GPU (24GB).	Optimizer: Adam Epoch size: 100 training epoch: 100 Batch size: 4 learning rate: 0.0001. This learning rate is multiplied by 0.1 after every 40 epochs.
9	[1]	Melanoma Detection based on Swin Transformer and SimAM	2021	Xie, J. and Wu, Z. and Zhu, R. and Zhu, H.	IEEE Xplore	Conference paper	China	ISIC-2017 skin dataset	public	https://www.kaggle.com/datasets/awsaf49/isic-2017	This work uses Swin transformer to extract astutue values from the dermoscopic images and accompanied by parameter-free attention module SimAM to make it pay more attention to the helpful parts of skin lesions	Their model(Swin-SimAM with Pre-training) achieved 0.900 AUC value, and 0.740 as an everage precision value.	average precision (AP) and AUC values	ISIC-2017 winner 1 ISIC-2017 winner 2 AttnMel-CNN Swin-SimAM without Pre-training Swin-T with Pre-training	Swin-SimAM with Pre-training is used for skin dermoscopic images segmentaion and lesion boundaries detection.	From ISIC-2017, the authors selected 2000 images for training, 150 for validation, and 600 for testing purposes.	Nil	Nil	They employedPyTorch with consistent settings to develop this research model.	training epoch: 50 learning rate: 1e-4, and it drops 0.8 times every 10 epochs,
10	[41]	Deep Features Fusion with Mutual Attention Transformer for Skin Lesion Diagnosis	2021	Zhou, L. and Luo, Y.	IEEE Xplore	Conference paper	USA	ISIC-2017	public	https://www.kaggle.com/datasets/awsaf49/isic-2017	This conference paper has reported the Swin-SimAM network, integrated the powerful feature extraction capabilities of Swin Transformer, and incorporating the parameter-free attention module SimAM to extract accurate of skin lesions.	An overall perfomance of 91.64% is for validation accuracy and 1.25 for validation mean loss. While on the test dataset an overall performacne of 92.55% for ACC values, 95.63% LRAP, and 98.28% AUC are achieved.	accuracy classification score (ACC), the label ranking average precision (LRAP) and the macro area under the receiver operating characteristic curve (AUC)	Multi-model DenseNet MobileNet Semi-supervised	MAT neural network is used to extract features from the multimodal data for skin lesions diagnosis.	IN the HAM10000 dataset, they selected 80% of the images from training set, 10% for validation, and 10% for test set.	N/A	Nil	They implemented their model in Python3 with Pytorch1.7.1 and Keras2.24 library.	Number of heads, h = 8 in every attention block Epoch size: 100 hidden size, d = 512 dropout rate: 0.1 Batch size = 64 Base learning rate is 10−4 with decay ratio equals to 0.2 Optimizer = Adam with β = (0.9, 0.98) and ε = 10−9.
11	[42]	TransFuse: Fusing Transformers and CNNs for Medical Image Segmentation	2021	Zhang, Y. and Liu, H. and Hu, Q.	Google Scholar	Conference paper	USA	All data are from different patients and with ethics approval, which consists of 267 patients of Avascular Necrosis, 182 patients of Osteoarthritis, 71 patients of Femur Neck Fracture, 33 patients of Pelvis Fracture, 26 patients of Developmental Dysplasia of the Hip and 62 patients of other dieases.	private		Parallel architecture consist of Transformer and CNN model to extract global and local features.		Jaccard Index, Dice score, pixel-wise accuracy, and SOTA methods, in terms of mean Dice (mDice) and mean Intersection-Over-Union (mIoU).	HardNet-MSEG, Unet, Unet++, ResUNet++, PraNet, TransFuse-L, TransFuse-S	They used the TransFuse model to retrieve both global and local details of the CT scan images.	Suring the training phase 1450 images are only selected from Kvasir and CVC-ClinicDB, while 798 testing images are from all five datasets. Finally, the resolution of each image is resized into 352×352 image size.	https://github.com/MIC-DKFZ/nnUNet	N/A	For this research work the authors recommened the GPU that should have 4 GB of VRAM. For training nnU-Net models the GPU should have at least 10 GB. TransFuse was built in PyTorch framework andtrained using a single NVIDIA-A100 GPU.	The values of α, β and γ were set to 0.5, 0.3, 0.2 empirically. Adam optimizer with learning rate of 1e-4 was adopted with 16 batch size.
12	[43]	Boundary-Aware Transformers for Skin Lesion Segmentation	2021	Wang, J. and Wei, L. and Wang, L. and Zhou, Q. and Zhu, L. and Qin, J.	Google Scholar	Conference paper	China	ISBI 2016, PH2 and ISIC 2018	public	https://www.kaggle.com/datasets/soumikrakshit/isbi-challenge-dataset	Bboundary-aware transformer (BAT) is used to comprehensively address the challenges of automatic skin lesion segmentation. Specifically, they integrated a new boundary-wise attention gate (BAG) into transformers to enable the whole network to not only effectively model global long-range dependencies via transformers.	Their model achieved 0.920 in Dice and 0.858 in IoU, outperform Lee et al by 0.2% and 1.5% in Dice and IoU, respectively.	dice score, IoU	Compared with both CNN and transformation models including DeepLabv3, UNet++, CE-Net and two transformer-based network (TransUNet, MedT).	They used BAT algorithm for lesion boudaries detection and semantic based information collection.	All images are empir_x0002_ically resized to (512 × 512) considering the efficiency, and we do data augmentation including vertical flip, horizontal flip and random scale change (limited 0.9-1.1).	https://github.com/jcwang123/BA-Transformer	Nil	These simulations are implemented on a single NVIDIA RTX 3090Ti.	Each mini-batch includes 24 images and they utilized Adam with an initial learning rate of 0.001 to optimize the network. Learning rate decrease in half when loss on the validation set has not dropped by 10 epochs. The encoder of each network has been pre-trained on ImageNet and all parameters are then fine-tuned for 500 epochs in total.
13	[44]	TransSLC: Skin Lesion Classification in Dermatoscopic Images Using Transformers	2022	Sarker, Md Mostafa Kamal and Moreno-GarcÃ­a, Carlos Francisco and Ren, Jinchang and Elyan, Eyad	Google Scholar	Conference paper	UK	HAM10000	public	https://www.kaggle.com/datasets/kmader/skin-cancer-mnist-ham10000	A tranformer model using bidirectional encoder is proposed for the classificaiton task.	An overall perfomrance results of 90.22%, 99.54%, 94.05%, and 96.28% in accuracy, precision, recall, and F1 score respectively, were achieved.	accuracy, precision, recall, and F1-score	Nil	Nil	Nil	Nil	Nil	Nil	Nil
14	[32]	Semi-Supervised Skin Lesion Segmentation With Coupling CNN and Transformer Features	2022	Alahmadi, M.D. Alghamdi, W.	IEEE Xplore	Journal article	Saudi Arabia	ISIC 2017, ISIC 2018, and PH2	public	https://www.kaggle.com/datasets/awsaf49/isic-2017 https://challenge.isic-archive.com/landing/2018/ https://www.kaggle.com/datasets/synked/ph2-modified	A piperlined archietecture is followed in this research work comprising a semi-supervised model.	After validating on three different datasets an overall performance of dice socre of 0.905% is reported for ISIC 2018, a dice socre of 0.898% is achieved for ISIC 2017, and dice score of 0.940% is reported for PH2 skin cancer database.	sensitivity (SE), SPecificity (SP), ACCuracy (ACC), and Dice coefficient (Dice).	U-Net, Att U-Net, DAGAN, TransUNet, MCGU-Net, MedT, FAT-Net, and MSA-UNet.	A semi-supervised deep learning model is used for retrieving semantic based information from the skin dermoscopic images.	• ISIC 2017 - From this database 2,000 images are for training, 150 images are for validation, and 600 images belong to the test phase. • ISIC 2018 - This dataset contains 3,694 RGB images, where originally 2,594 images are for training, 100 images are for validation, and 1,000 images belong to the test phase. As the available testing dataset was unlabelled, we randomly split the training dataset…	N/A	Nil	For the implemetation of this semi-supervised model, they used PyTorch framework on a single NVIDIA RTX 3090 GPU. All the samples from the datasets were resized to 224×224 resolution.
15	[33]	Multiclass skin lesion classification in dermoscopic images using swin transformer model	2022	Ayas, Selen	PubMed	Journal article	Turkey	ISIC 2019	public	https://www.kaggle.com/datasets/andrewmvd/isic-2019	Transformer-based CNN model	It achieves an overall sensitivity, specificity, accuracy, and balanced accuracy value of 82.3%, 97.9%, 97.2%, and 82.3%, respectively.	sensitivity, specificity, accuracy, and balanced accuracy	CSLNet algorithm and MetaBlock model	CNN is used for local feature accumulation and lesion boundary detection.	random number of images are used for training and testing process.	N/A	Nil	This model is implemented on a desktop computer using PyTorch and ith Intel(R) i7-7700 3.6 GHz CPU and a GPU of Nvidia GeForce GTX 1070Ti with 8GB memory.	The network is trained with the following parameters: Optimizer: AdamW learning rate: 1e-5 weight decay:1e-8. Batch size: 16 Training Epoch size: 30 epochs.
16	[37]	A multimodal transformer to fuse images and metadata for skin disease classification	2022	Cai G, Zhu Y, Wu Y, Jiang X, Ye J, Yang D.	Google Scholar	Journal article	China	ISIC 2018.	public	https://challenge.isic-archive.com/landing/2018/	multi-model transformer architecure consists of Vision Transformer (ViT) and soft label encoder (SLE).	0.9381 for acc, 0.9014 for Sen, 0.9836 for Spe, 0.9013 for F1, and 0.9932 for AUC values.	accuracy(Acc), AUC, sensitivity(Sen), specificity(Spe), F1 score, false positive, TF values, and confusion matrix.	DenseNet121 ResNet101 ViT-B Swin-B NesT-B	The ViT is used to extract skin melanoma featrues using encoder. Additionally, an SLE is designed to embed these features for optimum diagnosing and classification.	The ratio of the training set to the test set is about 4:1. The private dataset is randomly split into 610 images for training and 150 images for the test. And the public dataset contains 8012 images for training and 2003 images for the test.	N/A	Nil	All experiments are conducted on a single GPU (Titan).	Learning rate: 0.001 Epoch size: 50 optimizer: SGD instead of AdamW Batch size: 8
17	[45]	Exploring Advances in Transformers and CNN for Skin Lesion Diagnosis on Small Datasets	2022	de Lima, Leandro M Krohling, Renato A	Google Scholar	Conference paper	Brazil	PAD-UFES-20	public	https://github.com/labcin-ufes/PAD-UFES-20	This work has utilized different computer aided tools, deep learnign architectures, and visual transformers capabilities for skin cancer detection and segmentation.	Experiments show that PiT (0.800±0.006), CoaT (0.780±0.024) and ViT (0.771±0.018) transformer-based backbone models with MetaBlock fusion achieved state-of-the-art results for balanced accuracy.	balanced accuracy and AUC values	Model distillation or knowledge distillation model RegNetY Pooling-based Vision Transformer (PiT) ResNet V2 Co-scale conv-attentional image Transformers (CoaT)	Both the CNN-based upgraded models and transformers are used for skin lesion detection purposes. After experiments, it was concluded that the CNN models outperformed for smaller dataset while for large scale and unknown data the transformer outperfomed and generated effecient results.	In this research work, the authors provided the training and test sets in a random fashion to the already trained model on imageNet database.	N/A	Nil	For this experimental analysis, the authors used selected 20 models with 30M parameters or less and that needed less than 12GB GPU memory.	Optimizer: SGD Learning rate: 0.001 Epoch size: 15 weight decay: 0.001 momentum: 0.9
18	[36]	TC-Net: Dual coding network of Transformer and CNN for skin lesion segmentation	2022	Dong Y, Wang L, Li Y.	PubMed	Journal article	China	ISIC-2016, ISIC-2017, and ISIC-2018, ISBI2017	public	https://www.kaggle.com/datasets/awsaf49/isic-2017 https://www.kaggle.com/datasets/soumikrakshit/isbi-challenge-dataset	In this work, The dual coding fusion network architecture Transformer and CNN (TC-Net), as an architecture that can more accurately combine local feature information and global feature information, can improve the segmentation performance of skin images.	Compared with Swin UNet, on the ISIC2018 dataset, the TC-Net has increased by 2.46% in the dice index and about 4% in the JA index. On the ISBI2017 dataset, the dice and JA indices rose by about 4%.	Accuracy(ACC), sensitivity(SE), specificity(SP), preci- sion (PC), Jaccard index(JA) and dice index(DC)	U-Net R2U-Net CE-Net U-Net3+ SA-UNet Swin Unet	The TC-Net is used for skin lesion detection and its performance is compared with the targeted benchmark models.	The authors classified the data for all the three different datasets in the following fashion ISBI2016: Train = 900, validation = 79, Test = 300 ISBI2017: Train = 2000, validation = 150, Test = 600 ISIC2018: Train = 1815, validation = 259, Test = 520	N/A	Nil	PyTorch framework is selected for the deep architecture, the NVIDIA Tesla V100 is used as a hardware server tool.	Learning rate of 0.0001, epoch size of 200, adam optimizer, and fixed batch size of 16 is used in this research work.
19	[38]	SwinPA-Net: Swin Transformer-Based Multiscale Feature Pyramid Aggregation Network for Medical Image Segmentation	2022	Du H, Wang J, Liu M, Wang Y, Meijering E.	IEEE Xplore	Journal article	China	Polyp dataset, ISIC-2018, and LIVis Dataset: LIVis dataset is a clinical private dataset collected from six live TME surgeries conducted on six patients using the surgical robots.	public	https://challenge.isic-archive.com/landing/2018/	In this article, a novel method called Swin Pyramid Aggregation network (SwinPA-Net) is proposed by combining two designed modules with Swin Transformer to learn more powerful and robust features.	Compared with existing state-of-the-art (SOTA) methods, the SwinPA-Net achieves the most advanced performance and can outperform the second-best method on the mean Dice score by 1.68%, 0.8%, and 1.2% on the three tasks, respectively.	recall, mean Dice coefficient (mDice), mean intersection over union (mIoU), and mean absolute error (MAE).	U-Net, U-Net++, PraNet, CPF-Net, Transfuse-S, and SANet	SwinPA-Net is used for the accurate location and boundary identification of skin lesions.	ISIC-2018: They split the dataset into 2075 images for training and 519 images for testing. Polyp dataset : In this dataset the authors randomly split the images into 90% for training (1450 images in total) and 10% for testing (162 images in total). private dataset: the dataset was split into 844 images for training and 236 images for testing.	Nil	Nil	The network architecture was implemented in using the PyTorch framework, and all the experiments were performed on a standard workstation with a NVIDIA GeForce GTX 3090 GPU, an Intel Core 4215R CPU, and 128G RAM.	Optimizer: Adam Batch size: 6 training epoch: 50 learning rate: 0.0001.
20	[39]	SLT-Net: A codec network for skin lesion segmentation	2022	Feng K, Ren L, Wang G, Wang H, Li Y.	Google Scholar	Journal article	China	ISIC-2016, ISIC-2017, and ISIC-2018	public	https://www.kaggle.com/datasets/awsaf49/isic-2017	A new codec structure of skin lesion Transformer network (SLT-Net) was proposed and applied to skin lesion segmentation.	The DSC values on the three data sets reached 90.45%, 79.87% and 82.85% respectively, higher than most of the state-of-the-art methods.	intersection over union (IOU), dice similarity coefficient (DSC), relative volume difference (RVD), specificity (SP), and sensitivity (SE)	U-Net CSwinUnet CSwinUnet + CCM CSwinUnet + On ISIC-2018, it is also compared with U-Net, UNET++, CE-Net, DoubleU-Net, Swin-Unet, TransFuse, UCTransNet, and DCSAU-Ne	SLT-Net is used to identify the boundaries and featues of skin lesion and perform segmentation.		https://www.github.com/FengKaili-fkl/SLT-Net.git	Nil	The operating system Ubuntu 18.04 version is used with the GPU QuadroRTX8000 along with pytorch framework.	Optimizer: AdamW Weight decay: 0.0005 training epoch: 100, which was reduced by a factor often after 20 and 60 epochs respectively, learning rate: 0.0001.
22	[46]	Skin Lesion Segmentation via Intensive Atrous Spatial Transformer	2022	Liu, Xiuli Fan, Wanshu Zhou, Dongsheng	PubMed	Conference paper	China	ISIC2017 and ISIC2018	public	https://www.kaggle.com/datasets/awsaf49/isic-2017	A new segmentation-based framework named Intensive Atrous Spatial Transformer Network (IASTrans-Net), which is based on a core module Intensive Atrous Spatial Pyramid Pooling (IASPP) and atrous convolution for optimum features accumulation and segementaion purposes.	Nil	JI, dice score, accuracy	U-Net SwinUNet UCTransNet TransUNet SkinNet FrCN	The IASPP retrieves more accurate features by using multi-scale feature fusion and channel attention.	ISIC2017 Training set: 2000 dermatoscope images, 150 verification set images and 600 test set images. ISIC2018 2594 training sets, and 1000 test sets of dermoscopic images.	Nil	Nil	Nil	Optimizer: Adam Image size: 256 x 256 Batch size: 4 Epoch size: 50 Learning rate: the initial learning rate is set to 1e×10−3, and the learning rate for every 10 epochs is reduced by ten times, 1e×10−4, they trained the model to 50 epochs.
23	[34]	A Hybrid Preprocessor DE-ABC for Efficient Skin-Lesion Segmentation with Improved Contrast	2022	Malik, Shairyar Akram, Tallha Ashraf, Imran Rafiullah, Muhammad Ullah, Mukhtar Tanveer, Jawad	PubMed	Journal article	Pakistan	PH2, ISIC-2016, ISIC-2017, and ISIC-2018	public	https://www.kaggle.com/datasets/awsaf49/isic-2017 https://challenge.isic-archive.com/landing/2018/ https://www.kaggle.com/datasets/synked/ph2-modified	An upgraded boundary aware transformer is used to achieve high segmentation results using dermoscopic imags. The BAT model is upgraded with heuristic preprocessor (DE-ABC),which optimises the decision variables used in the contrast-enhancement transformation function.	This model achieved a considerable increase in jacard (IoU) and dice coeffecients for both comprehensive CNN and BAT models. For enhaced BAT model, it achieved a performance score of 0.8615 and 0.9256 for IoU and Dice score respectivity. While for comprehensive CNN, the enhaced model achieved 0.88845 and 0.9409 for IoU and Dice score respectivity.	Jacard index and dice coeffecient	BAT original + BAT enhanced with DE-ABC Comprehensive attention CNN (original) + Comprehensice attention CNN enhanced with DE-ABC	For lesion segementation, they exploited Boundary-Aware Transformer (BAT) updated with DE-ABC technique.	For experimental evaluation in this research work, they have selected four different datasets. These datasets are divided into different traning and test sets in the form of three different groups. Group - 1: In firest group they selected combination of 200 images from PH2 and 900 images from ISIC-2016 for training. While for testing, they selected 379 images from the ISIC-2016 testing dataset. G…	Nil	Nil	The authors used Python for the development of this model. While for simulations they used a single NVIDIA GeForce GTX 1660 Super GPU to train and test the segmentation models. The proposed DE-ABC was implemented in MATLAB 2022a.	Optimizer: Adam Image size: 512 x 512 Batch size: 8 Epoch size: 250 Learning rate: With an insignificant reduction in validation loss within 10 epochs, we brought the learning rate to 50%.
24	[47]	CTCNet: A Bi-directional Cascaded Segmentation Network Combining Transformers with CNNs for Skin Lesions	2022	Wang, J. Li, B. Guo, X. Huang, J. Song, M. Wei, M.	PubMed	Conference paper	China	PH2, ISIC-2016, ISIC-2017, and ISIC-2018	public	https://www.kaggle.com/datasets/awsaf49/isic-2017 https://challenge.isic-archive.com/landing/2018/	A parallel model is developed by integrating Transformers and CNNs (CTCNet) for Skin Lesions to improve the efficiency of the network in modeling the global context, while maintaining the control of the underlying details. The key purpose was to extract both local and global featrues from the dermoscopic images accurately and perform optimum diagnosis.	After performing their simulations, the authors conclude that the CCNet provides the Dice coefficient is notably improved by 2.82% compared with Unet and reaches 86.78% on the ISIC2017 dataset,while a better result forIOUwith 1.5% improvement is achieved on ISIC2018 dataset compared with Unext.	Dice score, IoU, TF, TP, FP, FN	Unet, Att-Unet, Cdnn, CPFNet, DCL, Transfuse, ResUNet, MedT, TransUnet, Unext	A data fusion strategy is followed by combining two-stream Cascaded Feature Aggregation (TCFA) modules, to integrate multi-level features from two branches efficiently. Moreover, they presented a Multi-Scale Expansion-Aware (MSEA) module based on the convolution of feature perception and expansion, which can extract high-level features containing more abundant context information and further enha…	The ISIC2017 includes different types of skin lesions,where 2000 images for the training set, 150 images in the validation set, and 600 images for the test set. While the images in ISIC2018 are divided into training and test set with 4:1 randomly.	Nil	Nil	For the implementation of the CTCNet CTCNet is implemented in the PyTorch framework and trained with a NVIDIA-GTX1080GPU of 12G memory.	ISIC2017 Batch size: 16 Epoch size: 30 Learning rate: 7e^-5 ISIC2018 For ISIC2018, they trained the untill 100 epochs with a learning rate of 1e−3
25	[37]	An improved transformer network for skin cancer classification	2022	Xin C, Liu Z, Zhao K, Miao L, Ma Y, Zhu X, Zhou Q, Wang S, Li L, Yang F, Xu S, Chen H.	PubMed	Journal article	China	HAM10000 dataset and another private clinical dataset of skin melanoma.	public	https://www.kaggle.com/datasets/kmader/skin-cancer-mnist-ham10000	A procedural approach is presented in this research study by developing an improved visual transformer for skin lesion detection. Firstly, they introduced the ViT for images classification purposes. Then they used a multi-scale and overlapping sliding windows are used to serialize the image and multi-scale patch embedding is carried out which pay more attention to multi-scale features. Finally, t…	This procedural model has achieved has achieved 94.3% accuracy on HAM10000 and 94.1% accuracy on private datasets, which verifies the efficiency of SkinTrans. Also, it achieved an AUC of 0.987 and precision of 0.941 much better than the selected benchmark models.	precision, recall/sensitivity, F-score, accuracy, and AUC values	Soft attention network Ensembles of multi-resolution EfficientNets Single model deep learning Data augmentation for skin classification Two path CNN model Deep CNN (Baseline) VIT model	They used the typical ViT along with multi-class sliding window to retrive semantic-based information from the dermoscopic images.	Nil	Nil	Nil	The deep learning framework PyTorch is used to build the neural network. The experimental hardware is equipped with a CPU (Intel (R) i7) and 2 GPUs (NVIDIA RTX 3060, 12 GB).	Optimizer: SGD Image size: 224 x 224 X 3 Batch size: 16 Decay Type: linear Learning rate: 0.001
26	[48]	Skin Cancer Classification Based on Convolutional Neural Networks and Vision Transformers	2022	Zhao, Z.	Google Scholar	Conference paper	China	HAM10000	public	https://www.kaggle.com/datasets/kmader/skin-cancer-mnist-ham10000	In this research work the authors compared the performance results of VGGNet and ResNet with Vision Transformers (ViT) and DeepViT.	The experimental results demonstrate that both CNN-based methods (ResNet18 and VGG16) performed well than transformers models. Also, the demonstrated that the limitations of the ViTs are more visible if the dataset becomes more smaller.	loss, accuracy, confusion matrix	VGG16 ResNet18 ViT DeepViT	Both THE CNN-based models and ViTs are used for skin lesion detection and bondaries extraction.	Nil	Nil	Nil	N/A	Learning rate: 0.00001 VGG16: A 16 layer deep CNN model is used with ReLu activation function and Softmax as an FCL function. ResNet18: Using VGGNet as a base model, an upgraded ResNet is used with 72-layer architecture with 18 deep layers. The use of such a huge model was to mitigate the problems of bursting and vanishing of gradients. ViT: A typical transformer model with MLP head layer is used…
27	[38]	APT-Net: Adaptive encoding and parallel decoding transformer for medical image segmentation	2022	Zhang N, Yu L, Zhang D, Wu W, Tian S, Kang X.	PubMed	Journal article	China	ISIC-2017 skin dataset, PH2 Though in this research work they also used Polyp dataset, and Glas dataset for gall blader cancer detection	public	https://www.kaggle.com/datasets/awsaf49/isic-2017 https://www.fc.up.pt/addi/ph2%20database.html	In this research work, the authors presented a hybrid model comprising a CNN-Transformer hybrid structure called as APT-Net. It is based on APT-Net based on the encoder-decoder architecture.	An overall IoU value of 0.783 has been achieved on the ISIC2017 dataset.	Acc, SE, SP, IoU, and Dice	UNet UNet++ AttUNet FocusNet DANet HRNet CENet DoubleUNet ResUNet CPFNet TransUNet FAT-Net	In this APT-Net model, the dual-path parallel decoder’s basic and guide information paths simultaneously process multiscale feature maps to efficiently utilize contextual information.	All the images in both of the datasets are resized this dataset to 224 ×224 and divided it into a training set, validation set, and test set according to a ratio of 7:1:2	Nil	Nil	The APT-Net is implemented implemented by using PyTorch 1.10.0 and trained on an NVIDIA RTX3060 GPU with 12 GB of RAM.	Optimizer: SGD Uniform image size: 224 x 224 momentum: 0.9 weight decay: 0.0001 Epoch size: 200 Batch size: 8 Learning rate: 0.01, and the learning rate decays after each iteration according to the following formula: lr_new=lr_base×(1 − iter/max_iter)^0.7,
28	[49]	RemixFormer: A Transformer Model for Precision Skin Tumor Differential Diagnosis via Multi-modal Imaging and Non-imaging Data	2022	Jing Xu, Yuan Gao, Wei Liu, Kai Huang, Shuang Zhao, Le Lu, Xiaosong Wang, Xian-Sheng Hua, Yu Wang & Xiang Chen	GoogleScholar	Conference Paper	China	Derm7pt dataset	public	https://github.com/jeremykawahara/derm7pt	A novel cross-modality-fusion module is also proposed and integrated with transformer-based multi-modality deep classification framework that can effectively perform multi-source data fusion (i.e., clinical images, dermoscopic images and accompanied with clinical patient-wise metadata) for skin tumors.	Their experimental work achieved an absolute 6.5% increase in averaged F1 and 2.8% in accuracy for the classification of five common skin tumors by comparing to the prior leading method on Derm7pt dataset of 1011 cases. More importantly, our method obtains an overall 88.5% classification accuracy using a large-scale in-house dataset of 5601 patients and in ten skin tumor classes (pigmented and no…	area under the curve, macro-averaged F1-score, sensitivity, precision, specificity, and overall accuracy	HcCNN Inception-comb ViT-S/16 FusionM4net	The authors have used ViT- S/16 for featrue collection and lesion segmentation.	The entire the entire dataset is randomly divided into 5 folds on the patient level with a 3:1:1 ratio as training, validation, and testing set.	Nil	Nil	This model is developed and trained on on 4 NVIDIA Tesla V100 GPUs	Optimizer: SGD Epoch size: 200 Batch size: 64 Learning rate: 1e-4

## Sheet: charts
Year	Type of paper	Country	Online repository					Public	Private	Hybrid
2021	Journal article	USA	IEEE Xplore					25	1	2
2022	Journal article	USA	PubMed
2022	Journal article	Netherlands	PubMed
2022	Journal article	Japan	Scopus
2022	Journal article	Saudi Arabia	PubMed
2022	Journal article	USA	PubMed
2022	Conference paper	Japan	IEEE Xplore
2022	Journal article	China	IEEE Xplore
2021	Conference paper	China	IEEE Xplore
2021	Conference paper	USA	IEEE Xplore
2021	Conference paper	USA	Google Scholar
2021	Conference paper	China	Google Scholar
2022	Conference paper	UK	Google Scholar
2022	Journal article	Saudi Arabia	IEEE Xplore
2022	Journal article	Turkey	PubMed
2022	Journal article	China	Google Scholar
2022	Conference paper	Brazil	Google Scholar
2022	Journal article	China	PubMed
2022	Journal article	China	IEEE Xplore
2022	Journal article	China	Google Scholar
2022	Conference paper	China	PubMed
2022	Journal article	Pakistan	PubMed
2022	Conference paper	China	PubMed
2022	Journal article	China	PubMed
2022	Conference paper	China	Google Scholar
2022	Journal article	China	PubMed
2022	Conference Paper	China	GoogleScholar
